# Supplementary figures and images for: Theoretical studies on FGFR isoform selectivity of FGFR1/FGFR4 inhibitors by molecular dynamics simulations and free energy calculations
Source: Royal Society of Chemistry journal article supplement (doi:10.1039/c6cp07964d), 2017-01-01

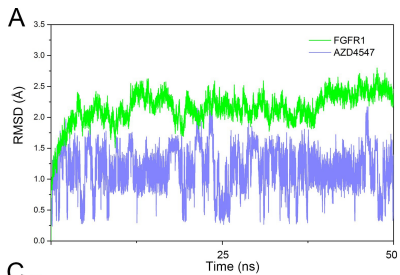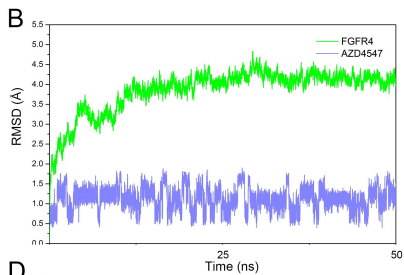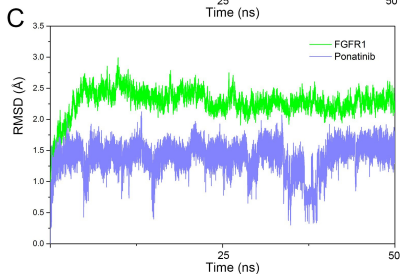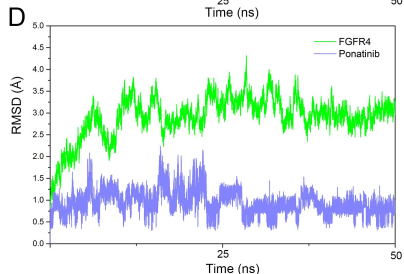

Supplement: c6cp07964d2.pdf [file c6cp07964d2.pdf]

A

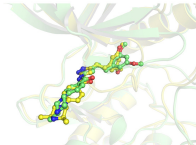

B

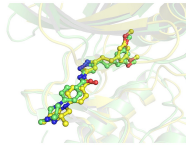

Supplement: c6cp07964d3.pdf [file c6cp07964d3.pdf]
